# Supplementary material for: A framework for ensemble modelling of climate change impacts on lakes worldwide: the ISIMIP Lake Sector
Source: Copernicus journal article supplement (doi:10.5194/gmd-15-4597-2022), 2022-06-16

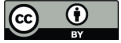

*Supplement of*

## **A framework for ensemble modelling of climate change impacts on lakes worldwide: the ISIMIP Lake Sector**

**Malgorzata Golub et al.**

*Correspondence to:* Wim Thiery ([wim.thiery@vub.be](mailto:wim.thiery@vub.be))

The copyright of individual parts of the supplement might differ from the article licence.

## Supplementary Information

### S1. Supplementary tables

**Table S1.** Summary of lake characteristics of 62 lakes participating in the local spatial domains of ISIMIP2a simulation runs. For site type, “L” refers to lakes and “R” refers to reservoirs.

| Site Name              | Country | Site type | Coordinates (lat; lon) | Climatic Zone | Surface area | Mean/Max Depth | Water transparency                                              | Data time span                           | Sampling frequency / temporal aggregation |
|------------------------|---------|-----------|------------------------|---------------|--------------|----------------|-----------------------------------------------------------------|------------------------------------------|-------------------------------------------|
| [--]                   | [--]    | [--]      | [decimal degrees]      | [--]          | km2          | [m]            | Average Secchi depth [m]; Diffuse attenuation coefficient [1/m] | [year]                                   | [--]                                      |
| Allequash              | US      | L         | 46.04, -89.62          | Dfb           | 1.64         | 2.90, 8.00     | 3.2; NA                                                         | 1981-2014                                | monthly / daily                           |
| Alqueva <sup>(a)</sup> | PT      | R         | 38.20, -7.49           | Csa           | 250          | 16.60, 92.00   | 2.9; 0.69                                                       | 2017-2018                                | sub-daily / hourly                        |
| Annecey                | FR      | L         | 45.87, 6.17            | Cfb           | 27           | 41.00, 65.00   | 5.2; NA                                                         | 2001-2015                                | monthly / daily                           |
| Annie                  | US      | L         | 27.21, -81.35          | Csc           | 0.36         | 4.30, 68.00    | NA; NA                                                          | 2008-2018                                | sub-daily / 15-min                        |
| Argyle                 | AU      | R         | -16.31, 128.68         | Bsh           | 980          | 10.10, 51.00   | NA; 0.89                                                        | 2011-2012                                | sub-daily / 15-min                        |
| Biel                   | CH      | L         | 47.08, 7.16            | Cfb           | 39.3         | 30.00, 74.00   | NA; 0.51                                                        | 1973-2015                                | monthly / daily                           |
| Big Muskellunge        | US      | L         | 46.02, -89.612         | Dfb           | 3.63         | 7.50, 21.30    | 6.6; NA                                                         | 1981-2014                                | monthly / daily                           |
| Black Oak              | US      | L         | 46.16, -89.32          | Dfb           | 2.28         | 10.36, 25.91   | 32.1; NA                                                        | 2004-2015                                | monthly / daily                           |
| Bourget                | FR      | L         | 45.76, 5.86            | Cfb           | 44           | 80.00, 145.00  | NA; NA                                                          | 2010-2014                                | Sub-monthly/ daily                        |
| Burley Griffin         | AU      | R         | -35.30, 149.07         | Cfb           | 6.64         | 5.00, 17.00    | 1.4; NA                                                         | 1981-2011                                | monthly / daily                           |
| Crystal                | US      | L         | 46.003, -89.61         | Dfb           | 0.38         | 10.40, 20.40   | 7.5; NA                                                         | 1981-2014                                | monthly / daily                           |
| Crystal Bog            | US      | L         | 46.008, -89.61         | Dfb           | 0.01         | 1.70, 2.50     | 1.5; NA                                                         | 1981-2014                                | monthly / daily                           |
| Delavan                | US      | L         | 42.61, -88.60          | Dfa           | 6.96         | 7.61, 16.46    | 3.5; NA                                                         | 1997-2018                                | monthly / daily                           |
| Dickie                 | CA      | L         | 45.15, -79.09          | Dfb           | 0.94         | 5.00, 12.00    | 3.1; NA                                                         | 2004-2014                                | monthly / daily                           |
| Eagle                  | CA      | L         | 44.68, -76.70          | Dfb           | 6.65         | 10.10, 31.10   | 4.6; NA                                                         | 2011-2013                                | daily / daily                             |
| Ekoln                  | SE      | L         | 59.75, 17.62           | Cfb           | 20.18        | 11.50, 50.00   | NA; 1.09                                                        | 1998-2005                                | daily / 30-min;                           |
| Erken                  | SE      | L         | 59.84, 18.63           | Cfb           | 24           | 9.00, 21.00    | 3.8; NA                                                         | 1961-2017 (daily); 1989-2016 (sub-daily) | monthly / daily; daily / 30-min           |
| Esthwaite Water        | UK      | L         | 54.37, -2.99           | Cfb           | 0.96         | 6.90, 16.00    | NA, 0.82                                                        | 2008-2010                                | sub-daily / hourly                        |

|                              |       |   |                    |     |       |                   |            |                                                               |                                          |
|------------------------------|-------|---|--------------------|-----|-------|-------------------|------------|---------------------------------------------------------------|------------------------------------------|
| Falling Creek <sup>(a)</sup> | US    | R | 37.31, -<br>79.84  | Csc | 119   | 4.00, 9.30        | NA; 0.87   | 2013-<br>2015                                                 | weekly / hourly                          |
| Feeagh                       | IE    | L | 53.94, -9.58       | Cfa | 3.9   | 14.50,<br>44.00   | 1.7; 0.98  | 2004-<br>2016                                                 | daily / hourly                           |
| Fish <sup>(a)</sup>          | US    | L | 43.29, -<br>89.65  | Dfb | 0.8   | 6.60,<br>18.90    | 2.4; NA    | 1996-<br>2014                                                 | monthly / daily                          |
| Geneva                       | FR/CH | L | 46.45,<br>6.59     | Cfa | 580.1 | 152.70,<br>309.70 | 6.0; NA    | 2010-<br>2015                                                 | monthly / daily                          |
| Great Pond                   | US    | L | 44.53, -<br>69.89  | Dfb | 32.55 | 6.40,<br>21.00    | 6.7; NA    | 2014-<br>2016                                                 | daily / hourly                           |
| Green                        | US    | L | 43.81, -<br>89.00  | Dfb | 29.48 | 33.55,<br>72.00   | 4.8; NA    | 2004-<br>2018                                                 | sub-monthly / daily                      |
| Harp                         | CA    | L | 45.38, -<br>79.13  | Dfb | 0.71  | 13.32,<br>37.50   | 4.08; NA   | 2004-<br>2014<br>(daily);<br>2013-<br>2014<br>(sub-<br>daily) | sub-monthly / daily; sub-daily<br>hourly |
| Kilpisjarvi                  | FI    | L | 69.03,<br>20.77    | Dfc | 37.3  | 20.00,<br>57.00   | NA; 0.3    | 2014-<br>2017                                                 | daily / daily                            |
| Kinneret                     | IL    | L | 32.83,<br>35.583   | Bsh | 168   | 24.00,<br>45.00   | 2.95; 0.51 | 2011-<br>2015                                                 | daily / daily                            |
| Kivu                         | RW/CD | L | -1.73, 29.24       | Aw  | 2700  | 240.00,<br>485.00 | 5.21; 0.27 | 2002-<br>2014                                                 | monthly / daily                          |
| Kuivajarvi                   | FI    | L | 61.85,<br>24.28    | Dfc | 0.62  | 6.30,<br>13.20    | NA; 0.6    | 2013-<br>2017                                                 | sub-daily / hourly                       |
| Langtjern                    | NO    | L | 60.37, 9.73        | Dfc | 0.23  | 2.00,<br>12.00    | 1.4; 2.25  | 2010-<br>2014                                                 | daily / daily                            |
| Laramie <sup>(a)</sup>       | US    | L | 40.62, -<br>105.84 | Dfc | 0.14  | NA, 6.40          | 0.6; NA    | 2015-<br>2017                                                 | monthly / daily                          |
| Lower Lake Zurich            | CH    | L | 47.28, 8.58        | Cfb | 67    | 49.00,<br>136.00  | NA; 0.39   | 1902-<br>2013                                                 | monthly / daily                          |
| Mendota                      | US    | L | 43.10, -<br>89.41  | Dfb | 39.61 | 12.80,<br>25.30   | 3; NA      | 1996-<br>2014                                                 | monthly / daily                          |
| Monona                       | US    | L | 43.06, -<br>89.36  | Dfb | 13.6  | 8.20,<br>22.50    | 2.4; NA    | 1996-<br>2014                                                 | monthly / daily                          |
| Mozhaysk <sup>(a)</sup>      | RU    | R | 55.59,<br>35.82    | Dfb | 30.7  | 7.00,<br>23.00    | 1; NA      | 2016<br>(daily);<br>2015-<br>2016<br>(sub-<br>daily)          | daily / daily;<br>sub-daily / hourly;    |
| Mt Bold <sup>(a)</sup>       | AU    | R | -35.12,<br>138.71  | Csb | 3.08  | 13.00,<br>45.40   | 1.24; 1.16 | 2006-<br>2015                                                 | daily / hourly                           |
| Muggelsee                    | DE    | L | 52.43,<br>13.65    | Cfb | 7.4   | 4.90, 7.70        | 2; 1.48    | 2008-<br>2018                                                 | daily / hourly                           |
| Neuchatel                    | CH    | L | 46.91, 6.89        | Cfb | 217   | 64.00,<br>152.00  | NA; 0.25   | 1963-<br>2013                                                 | monthly / daily                          |
| Ngoring                      | CN    | L | 34.90, 97.7        | ET  | 611   | 17.60,<br>30.70   | NA; 0.3    | 2015-<br>2016                                                 | daily / daily                            |
| Nohipalo Mustjarv            | EE    | L | 57.93,<br>27.34    | Dfb | 0.22  | 3.90, 8.90        | 0.46; NA   | 2015-<br>2017                                                 | sub-daily / 10-min                       |
| Nohipalo Valgejarv           | EE    | L | 57.94,<br>27.35    | Dfb | 0.07  | 6.20,<br>12.50    | 4.52; NA   | 2015-<br>2017                                                 | sub-daily / 10-min                       |
| Okauchee                     | US    | L | 43.13, -<br>88.43  | Dfa | 4.9   | 7.62,<br>28.65    | 6.94; NA   | 1988-<br>2014                                                 | monthly / daily                          |
| Paajarvi                     | FI    | L | 61.07,<br>25.13    | Dfb | 13.44 | 15.00,<br>85.00   | 2.2; 1.15  | 2012-<br>2016                                                 | monthly / daily                          |
| Rappbode                     | DE    | R | 51.74,<br>10.89    | Cfb | 3.95  | 28.60,<br>89.00   | 4.8; 0.25  | 2015-<br>2017                                                 | sub-monthly / hourly                     |
| Rimov <sup>(a)</sup>         | CZ    | R | 48.85,<br>14.49    | Cfb | 2.11  | 16.00,<br>44.00   | 2.9; NA    | 2007-<br>2012                                                 | sub-daily / hourly                       |
| Rotorua                      | NZ    | L | -38.08,<br>176.28  | Cfb | 425   | 10.80,<br>52.90   | 2.63; 0.61 | 1999-<br>2016                                                 | monthly / daily                          |
| Sammamish                    | US    | L | 47.59, -<br>122.10 | Csb | 19.8  | 17.70,<br>32.00   | 5; NA      | 1993-<br>2017                                                 | sub-monthly / hourly                     |
| Sau                          | ES    | R | 41.97, 2.39        | Cfa | 5.8   | 29.00,<br>65.00   | 2.57; 0.84 | 1963-<br>2017                                                 | monthly / daily                          |
| Sparkling                    | US    | L | 46.01, -<br>89.70  | Dfb | 0.64  | 10.90,<br>20.00   | 6.2; NA    | 1981-<br>2014                                                 | monthly / daily                          |
| Stechlin                     | DE    | L | 53.17,<br>13.03    | Cfb | 2.23  | 23.20,<br>69.50   | 8.6; 0.29  | 1996-<br>2017                                                 | monthly / daily                          |
| Sunapee                      | US    | L | 43.39, -<br>72.05  | Dfb | 16.55 | 11.40,<br>34.00   | 8.5; NA    | 1986-<br>2013<br>(daily);                                     | daily / daily; sub-daily / hourly        |

|                          |    |   |                |     |       |                |           |                       |                     |
|--------------------------|----|---|----------------|-----|-------|----------------|-----------|-----------------------|---------------------|
|                          |    |   |                |     |       |                |           | 2007-2013 (sub-daily) |                     |
| Tahoe                    | US | R | 39.09, -120.03 | Csb | 490   | 304.80, 501.00 | 19.9; NA  | 2012-2018             | monthly / daily     |
| Tarawera                 | NZ | L | -38.21, 176.43 | Cfb | 41.3  | 50.00, 87.50   | 8.3; 0.18 | 1996-2016             | monthly / daily     |
| Toolik                   | US | L | 68.63, -149.60 | Dfc | 1.49  | 7.00, 26.00    | 4.6; NA   | 1983-2014             | sub-monthly / daily |
| Trout                    | US | L | 46.03, -89.67  | Dfb | 15.65 | 14.60, 35.70   | 4.7; NA   | 1981-2014             | monthly / daily     |
| Trout Bog                | US | L | 46.04, -89.69  | Dfb | 0.011 | 5.60, 7.90     | 1.1; NA   | 1981-2014             | monthly / daily     |
| Two Sisters              | US | L | 45.77, -89.53  | Dfb | 2.91  | 9.14, 19.20    | 17.8; NA  | 1999-2015             | monthly / daily     |
| Vendyurskoe              | RU | L | 62.10, 33.10   | Dfc | 10.4  | 5.30, 13.40    | 3.5; 1.5  | 2007-2015             | daily / daily       |
| Vortsjarv <sup>(a)</sup> | EE | L | 58.31, 26.01   | Dfb | 270   | 2.80, 6.00     | 0.9; 2.76 | 2013-2018             | sub-daily / 10-min  |
| Washington               | US | L | 47.64, -122.27 | Csb | 87.6  | 33.00, 65.20   | 5.3; NA   | 1993-2017             | sub-daily / 30-min  |
| Windermere               | UK | L | 54.31, -2.95   | Cfb | 14.76 | 21.30, 64.00   | NA; 0.46  | 2008-2010             | sub-daily / hourly  |
| Wingra                   | US | L | 43.05, -89.46  | Dfb | 1.36  | 2.70, 6.70     | 0.7; NA   | 1996-2014             | monthly / daily     |

<sup>(a)</sup> Waterbodies experiencing significant water level fluctuations

**Table S2 Simulation information for models used in the local domain**

| <b>Model Information</b>     |                                    |                                                                               |                                                                                                         |                                                                                           |                                                    |                                                                                          |                                                                                          |                             |
|------------------------------|------------------------------------|-------------------------------------------------------------------------------|---------------------------------------------------------------------------------------------------------|-------------------------------------------------------------------------------------------|----------------------------------------------------|------------------------------------------------------------------------------------------|------------------------------------------------------------------------------------------|-----------------------------|
|                              | Model name                         | FLake <sup>1</sup>                                                            | ALBM <sup>2</sup>                                                                                       | air2water <sup>3</sup>                                                                    | MyLake <sup>4</sup>                                | Simstrat <sup>5</sup>                                                                    | GLM <sup>6</sup>                                                                         | GOTM <sup>7</sup>           |
|                              | Model version                      | 1.0                                                                           | 2.0                                                                                                     | 2.0.0 parm.                                                                               | 1.12                                               | 2.1.2                                                                                    | 3.0.0                                                                                    | 5.3                         |
|                              | Temporal Resolution<br>Input Data  | 3-hourly                                                                      | daily                                                                                                   | daily                                                                                     | daily                                              | daily                                                                                    | daily                                                                                    | daily                       |
| <b>Calibration</b>           |                                    |                                                                               |                                                                                                         |                                                                                           |                                                    |                                                                                          |                                                                                          |                             |
|                              | Was The Model<br>Calibrated        | Yes                                                                           | Yes                                                                                                     | Yes                                                                                       | Yes                                                | Yes                                                                                      | Yes                                                                                      | Yes                         |
|                              | Forcing data for<br>Calibration?   | EWEMBI                                                                        | EWEMBI                                                                                                  | EWEMBI                                                                                    | EWEMBI                                             | EWEMBI                                                                                   | EWEMBI                                                                                   | EWEMBI                      |
|                              | Calibration<br>performance metrics | rmse, centred<br>rmse, bias                                                   | rmse, r2 and<br>correlation                                                                             | rmse, nse                                                                                 | TSS, rmse, r2,<br>rsr                              | rmse                                                                                     | Pearson_r,<br>MAE,<br>RMSE, NSE                                                          | Pearson_r,<br>RMSE, NSE     |
| <b>Spin Up</b>               |                                    |                                                                               |                                                                                                         |                                                                                           |                                                    |                                                                                          |                                                                                          |                             |
|                              | Was a scenario spin-<br>up used?   | Yes                                                                           | Yes                                                                                                     | Yes                                                                                       | Yes                                                | No                                                                                       | Yes                                                                                      | Yes                         |
|                              | Spin-Up Design                     | First year of<br>each<br>simulation<br>period                                 | For the majority<br>lakes, a 2-year<br>spin-up was<br>used. For some<br>deep lakes 10<br>years or more. | First year of<br>each<br>simulation<br>period was<br>run starting<br>from LSWT<br>at 4°C. | First two years<br>of each<br>simulation<br>period | Only when<br>calibration<br>data started<br>less than 1<br>yr after<br>EWEMBI<br>forcing | Only when<br>calibration<br>data started<br>less than 1<br>yr after<br>EWEMBI<br>forcing |                             |
| <b>Initialization method</b> |                                    |                                                                               |                                                                                                         |                                                                                           |                                                    |                                                                                          |                                                                                          |                             |
|                              |                                    | uniform 4°C or<br>minimum<br>monthly air<br>temp,<br>whichever is<br>greatest | uniform 4°C. or<br>uniform mean<br>temp at the start<br>of the spin-up.                                 | 4°C on<br>January 1st                                                                     | 4°C on<br>January 1st                              | Initial<br>measured<br>temperature<br>profile                                            | Initial<br>measured<br>temperature<br>profile                                            | Initial me<br>temperature p |
| <b>Output resolution</b>     |                                    |                                                                               |                                                                                                         |                                                                                           |                                                    |                                                                                          |                                                                                          |                             |
|                              | Temporal Resolution                | Daily                                                                         | Daily                                                                                                   | Daily                                                                                     | Daily                                              | Daily                                                                                    | Daily                                                                                    | Daily                       |
|                              | Vertical Structure                 | Parametrized<br>temperature<br>profile                                        | multi-layer<br>variable                                                                                 | single, time-<br>varying<br>surface layer                                                 | multi-layer<br>variable                            | multi-layer                                                                              | multi-layer<br>variable                                                                  | multi-layer fix             |
|                              | Runtime Layer<br>Thickness         | Time varying                                                                  | Irregular                                                                                               | Time varying<br>depending<br>on an<br>empirical law                                       | 0.5 m                                              | 0.5m(<50m)<br>1m(>50m)                                                                   | 0.5 m                                                                                    | 0.5 m                       |
|                              | Number of Layers<br>reported       | 20                                                                            | 50                                                                                                      | surface only                                                                              | 0.5-Max Depth                                      | 0.5-Max<br>Depth                                                                         | 0.5-Max<br>Depth                                                                         | 0.5-Max Dep                 |

<sup>1</sup>Mironov, D. (2008). Parameterization of lakes in numerical weather prediction. Description of a lake model. COSMO Technical Report No. 11. Offenbach am Main, Germany, Deutscher Wetterdienst.

**Contact responsible for simulations:** Tom Shatwell (tom.shatwell@ufz.de), Georgiy Kirillin (kirillin@igb-berlin.de)

<sup>2</sup> Tan Z, Zhuang Q, Walter Anthony K (2015). Modeling methane emissions from arctic lakes: Model development and site-level study. Journal of Advances in Modeling Earth Systems,7,459-483.

**Contact responsible for simulations:** tanzeli1982@gmail.com

<sup>3</sup> Piccolroaz S., M. Toffolon, and B. Majone (2013), A simple lumped model to convert air temperature into surface water temperature in lakes, Hydrol. Earth Syst. Sci., 17, 3323-3338, doi:10.5194/hess-17-3323-2013

**Contact responsible for simulations:** Sebastiano Piccolroaz (s.piccolroaz@unitn.it); Bronwyn Woodward (bronwyn.woodward@uwa.edu.au)

<sup>4</sup> Saloranta and Andersen 2007 Ecol. Mod.

**Contact responsible for simulations:** Raoul Couture (Raoul.Couture@chm.ulaval.ca)

5 <sup>5</sup> Goudsmit, G. H., Burchard, H., Peeters, F., & Wüest, A. (2002). Application of k- $\epsilon$  turbulence models to enclosed basins: The role of internal seiches. *Journal of Geophysical Research: Oceans*, 107(C12), 23-1.

**Contact responsible for simulations:** Martin Schmid (martin.schmid@eawag.ch)

10 <sup>6</sup> Hipsey, M. R., Bruce, L. C., Boon, C., Busch, B., Carey, C. C., Hamilton, D. P., Hanson, P. C., Read, J. S., de Sousa, E., Weber, M., and Winslow, L. A.: A General Lake Model (GLM 3.0) for linking with high-frequency sensor data from the Global Lake Ecological Observatory Network (GLEON), *Geosci. Model Dev.*, 12, 473–523, <https://doi.org/10.5194/gmd-12-473-2019>, 2019.

**Contact responsible for simulations:** Tadhg Moore (tadhgm@vt.edu), Robert Ladwig (rladwig2@wisc.edu)

15 <sup>7</sup> Burchard, H., Bolding, K., Kühn, W., Meister, A., Neumann, T., & Umlauf, L. (2006). Description of a flexible and extendable physical-biogeochemical model system for the water column. *Journal of Marine Systems*, 61, 180–211.

**Contact responsible for simulations:** Tadhg Moore (tadhgm@vt.edu)

**Table S3 Simulation information for models used in the global domain**

| Model Information     |                                |                                                                                                                             |                                                                                                                |                                                                 |                                                                               |                                                                                                                                           |                                                        |                                           |
|-----------------------|--------------------------------|-----------------------------------------------------------------------------------------------------------------------------|----------------------------------------------------------------------------------------------------------------|-----------------------------------------------------------------|-------------------------------------------------------------------------------|-------------------------------------------------------------------------------------------------------------------------------------------|--------------------------------------------------------|-------------------------------------------|
|                       | Impact model name:             | VIC-LAKE <sup>1</sup>                                                                                                       | ALBM <sup>2</sup>                                                                                              | LAKE <sup>3</sup>                                               | FLake <sup>4</sup>                                                            | Simstrat-UoG <sup>5</sup>                                                                                                                 | GOTM <sup>6</sup>                                      | CLM4.5 <sup>7</sup>                       |
|                       | Model version                  | 1.0                                                                                                                         | 2.0                                                                                                            | 2.0                                                             | 1.0                                                                           | 1.4 modified                                                                                                                              | 5.3                                                    | 4.5                                       |
| Spin-Up               |                                |                                                                                                                             |                                                                                                                |                                                                 |                                                                               |                                                                                                                                           |                                                        |                                           |
|                       | Was A Spin-Up Performed?       | Yes                                                                                                                         | Yes                                                                                                            | Yes                                                             | Yes                                                                           | Yes                                                                                                                                       | No                                                     | No                                        |
|                       | Spin-Up Design                 | Historical 10 years of spin-up from the piControl. Future simulations started from historical simulations no spin-up needed | A 2-Year spin-up was conducted. Forcing data from 2006 used for future runs and 1979 used for historical runs. | 30 years of spinup using 1661-1670 picontrol data               | 2-year spin-up to 'set' initial conditions (first two years of met data used) | 30-year spin-up (year 1661 repeated 30 times) were used with the picontrol simulations. Historical simulations started from the picontrol | 1-year spin-up using the first year of each simulation | Initialized from spu picontrol simulation |
| Initialization method |                                |                                                                                                                             |                                                                                                                |                                                                 |                                                                               |                                                                                                                                           |                                                        |                                           |
|                       |                                | lake temperature based on mean soil temperature                                                                             | uniform 4°C. or uniform mean temp at the start of the spin-up.                                                 | linear profile 4°C at bottom to surface temp equal to air temp. | uniform 4°C.                                                                  | uniform 10°C.                                                                                                                             |                                                        |                                           |
| Input Resolution      |                                |                                                                                                                             |                                                                                                                |                                                                 |                                                                               |                                                                                                                                           |                                                        |                                           |
|                       | Spatial Aggregation:           | regular grid                                                                                                                | regular grid                                                                                                   | regular grid                                                    | regular grid                                                                  | regular grid                                                                                                                              | regular grid                                           | regular grid                              |
|                       | Spatial Resolution             | 0.5 degree                                                                                                                  | 0.5 degree                                                                                                     | 0.5 degree                                                      | 0.5 degree                                                                    | 0.5 degree                                                                                                                                | 0.5 degree                                             | 0.5 degree                                |
|                       | Temporal Resolution Input Data | 6-hourly                                                                                                                    | daily                                                                                                          | daily                                                           | daily                                                                         | 3-hourly                                                                                                                                  | daily                                                  | daily                                     |
| Output resolution     |                                |                                                                                                                             |                                                                                                                |                                                                 |                                                                               |                                                                                                                                           |                                                        |                                           |
|                       | Temporal Resolution            | daily                                                                                                                       | daily                                                                                                          | daily                                                           | daily                                                                         | daily                                                                                                                                     | daily                                                  | daily                                     |
|                       | Vertical Structure             | multi-layer                                                                                                                 | multi-layer                                                                                                    | multi-layer                                                     | surface only                                                                  | multi-layer                                                                                                                               | multi-layer                                            | multi-layer                               |
|                       | Layer Thickness                | irregular                                                                                                                   | grid variable                                                                                                  | irregular                                                       |                                                                               | irregular                                                                                                                                 | irregular                                              | variable                                  |
|                       | Number of Layers               | 1000                                                                                                                        | 50                                                                                                             | 20                                                              |                                                                               | 13                                                                                                                                        | 10                                                     | 10                                        |

<sup>1</sup>Bowling, L. C., & Lettenmaier, D. P. 2010. Modeling the effects of lakes and wetlands on the water balance of Arctic environments. *Journal of Hydrometeorology*, 11(2), 276-295.

**Contact responsible for simulations:** bram.droppers@wur.nl; annette.janssen@wur.nl

5 <sup>2</sup>Tan Z, Zhuang Q, Walter Anthony K (2015). Modeling methane emissions from arctic lakes: Model development and site-level study. *Journal of Advances in Modeling Earth Systems*, 7, 459-483

**Contact responsible for simulations:** tanzeli1982@gmail.com

<sup>3</sup>Stepanenko, V., Mammarella, I., Ojala, A., Miettinen, H., Lykosov, V., and Vesala, T 2006 LAKE 2.0: a model for temperature, methane, carbon dioxide and oxygen dynamics in lakes, *Geosci. Model Dev.*, 9, 1977–2006

10 **Contact responsible for simulations:** stepanen@srcc.msu.ru

- <sup>4</sup>Mironov, D. (2008). Parameterization of lakes in numerical weather prediction. Description of a lake model. COSMO Technical Report No. 11. Offenbach am Main, Germany, Deutscher Wetterdienst.  
**Contact responsible for simulations:** riwoolway@gmail.com
- <sup>5</sup>Goudsmit, G. -H.; Burchard, H.; Peeters, F.; Wüest, A. 2002 Application of k- $\epsilon$  turbulence models to enclosed  
5 basins: the role of internal seiches, *Journal of Geophysical Research C: Oceans*, 107(C12), 3230  
**Contact responsible for simulations:** marjorie.perroud@alpiq.com
- <sup>6</sup>Burchard, H., Bolding, K., Kühn, W., Meister, A., Neumann, T., & Umlauf, L. (2006). Description of a flexible and extendable physical-biogeochemical model system for the water column. *Journal of Marine Systems*, 61, 180–211  
10 **Contact responsible for simulations:** golubm@dkit.ie; dmercado@icra.cat
- <sup>7</sup>Subin, Z. M., Riley, W. J., & Mironov, D. (2012). An improved lake model for climate simulations: Model structure, evaluation, and sensitivity analyses in CESM1. *Journal of Advances in Modeling Earth Systems*, 4(1).  
**Contact responsible for simulations:** wim.thiery@vub.be



**Table S4.** List of output variables from lake models to be reported in the Lake Sector of ISIMIP2a/b. See simulation protocol (<https://www.isimip.org/protocol>) for more details and an up-to-date list.

| Variable Abbreviation<br>[unit] | Variable full name<br>[text]                                              |
|---------------------------------|---------------------------------------------------------------------------|
| Albedo [0-1]                    | Surface albedo                                                            |
| Bottemp [K]                     | Bottom temperature (i.e., Integrated over hypolimnion)                    |
| Extcoeff [ $m^{-1}$ ]           | Diffuse attenuation coefficient                                           |
| Ice [0-1]                       | Lake ice cover                                                            |
| Icetemp [K]                     | Temperature at the ice upper surface                                      |
| Icethick [m]                    | Ice thickness                                                             |
| Lakeheatf [ $W m^{-2}$ ]        | Downward heat flux at the lake atmosphere interface (i.e., net heat flux) |
| Lakeicefrac [0-1]               | Lake layer ice mass fraction                                              |
| Latentheatf [ $W m^{-2}$ ]      | Latent heat flux at the lake-atmosphere interface                         |
| Lwup [ $W m^{-2}$ ]             | Upward longwave radiation flux at the lake-atmosphere interface           |
| Momf [ $kg m^{-1} s^{-2}$ ]     | Momentum flux at the lake-atmosphere interface                            |
| Sedheatf [ $W m^{-2}$ ]         | Sediment upward heat flux at the lake sediment interface                  |
| Sensheatf [ $W m^{-2}$ ]        | Sensible heat flux at the lake-atmosphere interface                       |
| Snowtemp [K]                    | Temperature at the snow upper surface                                     |
| Snowthick [m]                   | Snow thickness                                                            |
| Strat [0-1]                     | Thermal stratification                                                    |
| Surftemp [K]                    | Surface temperature (i.e., Integrated over epilimnion)                    |
| Swup [ $W m^{-2}$ ]             | Upward shortwave radiation flux at the lake-atmosphere interface          |
| Thermodepth [m]                 | Depth of thermocline                                                      |
| Turbdiffheat [ $m^2 s^{-1}$ ]   | Turbulent diffusivity of heat                                             |
| Watertemp [K]                   | Water temperature (i.e., full profile)                                    |

**Figure S1.** Global mean annual surface temperature of lakes by end of the 21<sup>st</sup> century (2070-2099) under three greenhouse gas emission scenarios (RCP2.6, RCP6.0, RCP8.5) simulated with GOTM global (**Panels A, C, E**); End-of-century temperature anomaly (2070-2099) under three greenhouse gas emission scenarios (RCP2.6, RCP6.0, RCP8.5) compared to pre-industrial control levels (**Panels B, D, F**).

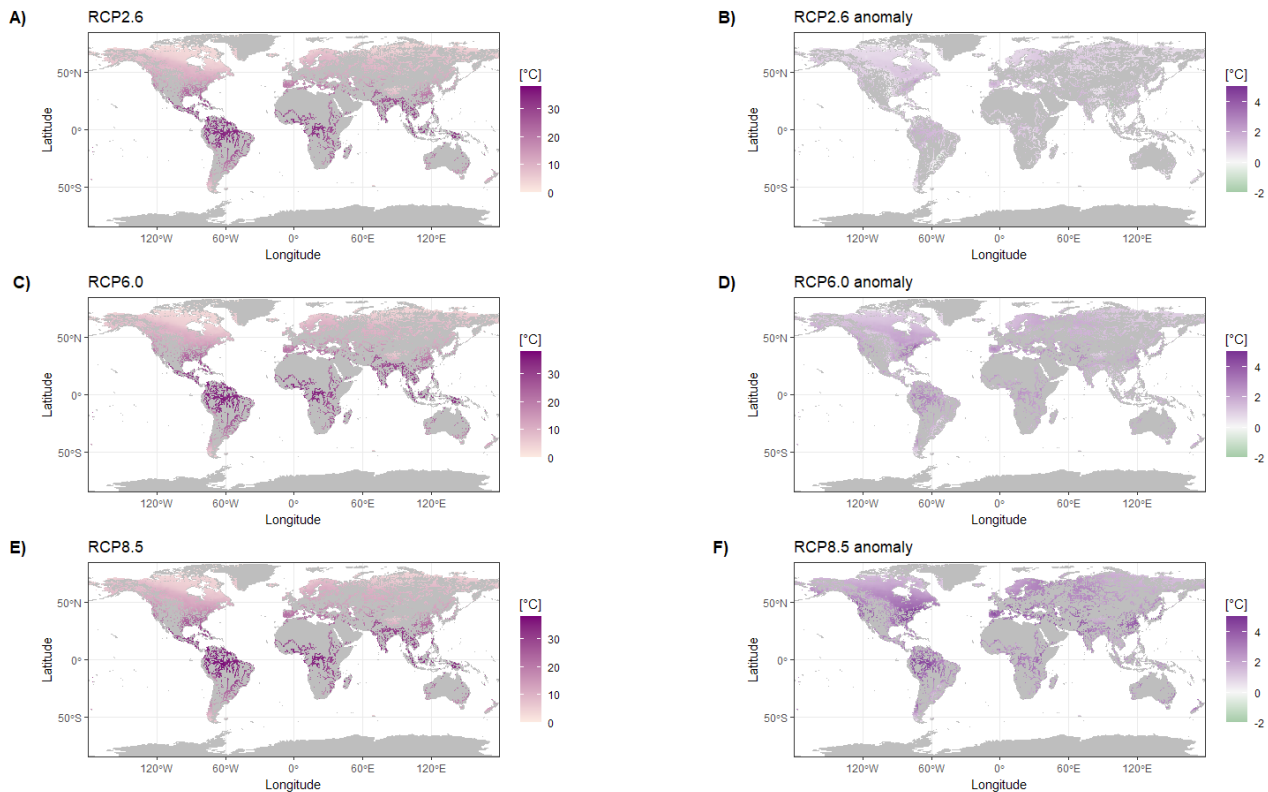

Supplement: Supplementary file [file gmd-15-4597-2022-supplement.pdf]
